# Supplementary material for: Retention and radiative forcing of black carbon in eastern Sierra Nevada snow
Source: Copernicus journal article supplement (doi:10.5194/tc-7-365-2013), 2013-02-28
Supplement: Supplementary file 1 [file tc-7-365-2013-supplement.pdf]

February 28, 2009: 10 - 14:00 PST

High clouds, light wind

Total depth (cm) 338  
 Air Temp (C) 4  
 tare (g) 715 1-Liter

| <i>0 is the soil surface</i> | Field Measurements |          |                              |         | rBC            |       | Soluble Ions |                     |                |                 |                 |
|------------------------------|--------------------|----------|------------------------------|---------|----------------|-------|--------------|---------------------|----------------|-----------------|-----------------|
| Depth Interval (cm)          | Temp (C)           | Mass (g) | Density (g/cm <sup>3</sup> ) | Notes:  | BC conc (ng/g) | Error | SWE (cm)     | Cumulative SWE (cm) | Nitrate (um/L) | Ammonium (um/L) | Chloride (um/L) |
| 0-10                         | -1                 | 424      | 0.424                        | w/ tare | 4.07           | 5.18% | 4.24         | 4.24                | 6.25           | 0.94            | 26.12           |
| 10-20                        | -1                 | 462      | 0.462                        | w/ tare | 5.77           | 5.18% | 4.62         | 8.86                | 13.22          | 6.28            | 69.98           |
| 20-30                        | -1.5               | 403      | 0.403                        | w/ tare | 5.82           | 5.18% | 4.03         | 12.89               | 12.33          | 4.99            | 24.99           |
| 30-40                        | -1                 | 433      | 0.433                        | w/ tare | 4.71           | 5.18% | 4.33         | 17.22               | 6.02           | 4.12            | 19.08           |
| 40-50                        | -1                 | 427      | 0.427                        | w/ tare | 2.00           | 5.18% | 4.27         | 21.49               | 9.42           | 2.18            | 17.45           |
| 50-60                        | -1.5               | 1158     | 0.443                        |         | 4.63           | 5.18% | 4.43         | 25.92               | 7.16           | 1.49            | 41.46           |
| 60-70                        | -2                 | 430      | 0.43                         | w/ tare | 4.50           | 5.18% | 4.3          | 30.22               | 10.35          | 0.05            | 78.10           |
| 70-80                        | -2                 | 410      | 0.41                         | w/ tare | 2.64           | 5.18% | 4.1          | 34.32               | 9.30           | 7.20            | 12.12           |
| 80-90                        | -2                 | 1147     | 0.432                        |         | 3.03           | 5.18% | 4.32         | 38.64               | 14.45          | 2.20            | 45.13           |
| 90-100                       | -2                 | 1097     | 0.382                        |         | 0.96           | 5.18% | 3.82         | 42.46               | 4.49           | 0.58            | 9.77            |
| 100-110                      | -2.5               | 1103     | 0.388                        |         | 7.99           | 5.18% | 3.88         | 46.34               | 11.28          | 2.45            | 24.21           |
| 110-120                      | -3                 | 396      | 0.396                        | w/ tare | 6.82           | 5.18% | 3.96         | 50.3                | 11.24          | 1.52            | 23.48           |
| 120-130                      | -3                 | 1090     | 0.375                        |         | 1.25           | 5.18% | 3.75         | 54.05               | 6.09           | 0.30            | 7.13            |
| 130-140                      | -3.5               | 1091     | 0.376                        |         | 3.41           | 5.18% | 3.76         | 57.81               | 7.94           | 1.01            | 13.12           |
| 140-150                      | -4                 | 1067     | 0.352                        |         | 3.03           | 5.18% | 3.52         | 61.33               | 10.52          | 1.37            | 8.79            |
| 150-160                      | -4                 | 914      | 0.199                        |         | 8.42           | 5.18% | 1.99         | 63.32               | 11.53          | 2.77            | 28.56           |
| 160-170                      | -4                 | 1071     | 0.356                        |         | 19.24          | 5.18% | 3.56         | 66.88               | 16.56          | 10.13           | 22.19           |
| 170-180                      | -4.5               | 1034     | 0.319                        |         | 11.41          | 5.18% | 3.19         | 70.07               | 10.64          | 1.60            | 17.78           |
| 180-190                      | -5                 | 1034     | 0.319                        |         | 12.51          | 5.18% | 3.19         | 73.26               | 9.36           | 2.16            | 13.72           |
| 190-200                      | -5                 | 1051     | 0.336                        |         | 13.24          | 5.18% | 3.36         | 76.62               | 12.55          | 9.63            | 13.39           |
| 200-210                      | -4.5               | 1031     | 0.316                        |         | 2.99           | 5.18% | 3.16         | 79.78               | 8.97           | 2.89            | 17.42           |
| 210-220                      | -4.5               | 1029     | 0.314                        |         | 3.64           | 5.18% | 3.14         | 82.92               | 11.96          | 2.62            | 20.97           |
| 220-230                      | -5                 | 1029     | 0.314                        |         | 7.46           | 5.18% | 3.14         | 86.06               | 8.31           | 2.93            | 33.33           |
| 230-240                      | -4.5               | 966      | 0.251                        |         | 1.48           | 5.18% | 2.51         | 88.57               | 8.45           | 7.20            | 21.24           |
| 240-250                      | -4.5               | 977      | 0.262                        |         | 1.34           | 5.18% | 2.62         | 91.19               | 3.20           | 1.28            | 23.82           |
| 250-260                      | -4.5               | 1048     | 0.333                        |         | 1.55           | 5.18% | 3.33         | 94.52               | 7.33           | 1.91            | 10.05           |
| 260-270                      | -4.5               | 1029     | 0.314                        |         | 2.07           | 5.18% | 3.14         | 97.66               | 7.33           | 2.56            | 13.66           |
| 270-280                      | -5                 | 968      | 0.253                        |         | 2.44           | 5.18% | 2.53         | 100.19              | 11.22          | 1.09            | 25.94           |
| 280-290                      | -4.5               | 938      | 0.223                        |         | 2.18           | 5.18% | 2.23         | 102.42              | 9.56           | 0.54            | 14.34           |
| 290-300                      | -4.5               | 952      | 0.237                        |         | 11.61          | 5.18% | 2.37         | 104.79              | 10.83          | 1.24            | 12.36           |
| 300-310                      | -5                 | 989      | 0.274                        |         | 5.35           | 5.18% | 2.74         | 107.53              | 7.64           | 0.60            | 12.89           |
| 310-320                      | -5.5               | 1031     | 0.316                        |         | 6.62           | 5.18% | 3.16         | 110.69              | 8.21           | 1.48            | 16.43           |
| 320-330                      | -5.5               | 1077     | 0.362                        |         | 6.43           | 5.18% | 3.62         | 114.31              | 3.77           | 2.59            | 19.34           |
| 328-338                      | -5                 | 1077     | 0.362                        |         | 11.05          | 5.18% | 3.62         | 117.93              | 7.87           | 1.68            | 25.57           |

| Surface Sample ID         | BC conc (ng/g) | Error |
|---------------------------|----------------|-------|
| east pit 1                | 50.44          | 5.18% |
| east pit 2                | 52.06          | 5.18% |
| surface #1 snowcat refuel | 3.10           | 5.18% |
| surface #2 snowcat        | 11.86          | 5.18% |
| surface #3                | 5.78           | 5.18% |
| surface #4                | 3.35           | 5.18% |

March 28, 2009: 11:00 - 16:00 PST

no clouds, no wind

Total depth (cm) 360  
 Air Temp (C) 7.5  
 tare (g) 160 1/4 Liter

| <i>0 is the soil surface</i> | Field Measurements |          |                 |        | rBC            |       | Soluble Ions |                     |                |                 |                 |  |
|------------------------------|--------------------|----------|-----------------|--------|----------------|-------|--------------|---------------------|----------------|-----------------|-----------------|--|
| Depth Interval (cm)          | Temp (C)           | Mass (g) | Density (g/cm3) | Notes: | BC conc (ng/g) | Error | SWE (cm)     | Cumulative SWE (cm) | Nitrate (um/L) | Ammonium (um/L) | Chloride (um/L) |  |
| 0-10                         | 0                  | 254      | 0.376           |        | 4.70           | 5.18% | 3.76         | 3.76                | 4.74           | 1.53            | 26.26           |  |
| 10-20                        | 0                  | 259      | 0.396           |        | 4.47           | 5.18% | 3.96         | 7.72                | 5.69           | 1.77            | 31.45           |  |
| 20-30                        | -0.5               | 247      | 0.348           |        | 2.47           | 5.18% | 3.48         | 11.20               | 10.83          | 2.89            | 26.13           |  |
| 30-40                        | -0.5               | 274      | 0.456           |        | 16.26          | 5.18% | 4.56         | 15.76               | 10.61          | 6.41            | 62.61           |  |
| 40-50                        | -1                 | 245      | 0.34            |        | 3.89           | 5.18% | 3.40         | 19.16               | 5.53           | 0.54            | 19.30           |  |
| 50-60                        | -1                 | 271      | 0.444           |        | 1.76           | 5.18% | 4.44         | 23.60               | 7.28           | 2.89            | 71.21           |  |
| 60-70                        | -1                 | 262      | 0.408           |        | 4.29           | 5.18% | 4.08         | 27.68               | 12.13          | 1.25            | 31.20           |  |
| 70-80                        | -1                 | 259      | 0.396           |        | 3.36           | 5.18% | 3.96         | 31.64               | 7.72           | 1.80            | 43.10           |  |
| 80-90                        | -1                 | 272      | 0.448           |        | 3.90           | 5.18% | 4.48         | 36.12               | 6.71           | 1.49            | 72.34           |  |
| 90-100                       | -1.5               | 267      | 0.428           |        | 3.86           | 5.18% | 4.28         | 40.40               | 8.03           | 1.78            | 64.73           |  |
| 100-110                      | -1.5               | 258      | 0.392           |        | 1.33           | 5.18% | 3.92         | 44.32               | 4.27           | 0.43            | 59.13           |  |
| 110-120                      | -1.5               | 266      | 0.424           |        | 0.75           | 5.18% | 4.24         | 48.56               | 3.04           | 1.05            | 70.73           |  |
| 120-130                      | -2                 | 263      | 0.412           |        | 1.35           | 5.18% | 4.12         | 52.68               | 4.27           | 0.73            | 58.62           |  |
| 130-140                      | -1.5               | 259      | 0.396           |        | 1.66           | 5.18% | 3.96         | 56.64               | 7.72           | 4.09            | 62.02           |  |
| 140-150                      | -2                 | 263      | 0.412           |        | 11.05          | 5.18% | 4.12         | 60.76               | 10.72          | 10.87           | 91.37           |  |
| 150-160                      | -2                 | 260      | 0.4             |        | 2.30           | 5.18% | 4.00         | 64.76               | 7.87           | 1.13            | 64.12           |  |
| 160-170                      | -2                 | 253      | 0.372           |        | 13.37          | 5.18% | 3.72         | 68.48               | 14.16          | 6.57            | 51.61           |  |
| 170-180                      | -2.5               | 261      | 0.404           |        | 4.63           | 5.18% | 4.04         | 72.52               | 12.47          | 1.87            | 94.75           |  |
| 180-190                      | -2                 | 253      | 0.372           |        | 1.64           | 5.18% | 3.72         | 76.24               | 5.37           | 5.13            | 67.00           |  |
| 190-200                      | -2                 | 256      | 0.384           |        | 0.72           | 5.18% | 3.84         | 80.08               | 6.48           | 1.58            | 65.42           |  |
| 200-210                      | -3                 | 257      | 0.388           |        | 2.95           | 5.18% | 3.88         | 83.96               | 10.89          | 1.02            | 32.73           |  |
| 210-220                      | -2                 | 252      | 0.368           |        | 2.09           | 5.18% | 3.68         | 87.64               | 7.84           | 1.87            | 85.38           |  |
| 220-230                      | -2.5               | 257      | 0.388           |        | 5.80           | 5.18% | 3.88         | 91.52               | 6.48           | 4.27            | 91.35           |  |
| 230-240                      | -2.5               | 266      | 0.424           |        | 1.92           | 5.18% | 4.24         | 95.76               | 6.14           | 2.59            | 66.28           |  |
| 240-250                      | -2                 | 246      | 0.344           |        | 11.35          | 5.18% | 3.44         | 99.20               | 7.39           | 0.91            | 45.10           |  |
| 250-260                      | -2.5               | 248      | 0.352           |        | 4.35           | 5.18% | 3.52         | 102.72              | 7.11           | 10.39           | 48.13           |  |
| 260-270                      | -2                 | 262      | 0.408           |        | 5.07           | 5.18% | 4.08         | 106.80              | 5.05           | 1.19            | 60.20           |  |
| 270-280                      | -2                 | 254      | 0.376           |        | 4.75           | 5.18% | 3.76         | 110.56              | 7.50           | 0.71            | 32.59           |  |
| 280-290                      | -2.5               | 256      | 0.384           |        | 3.50           | 5.18% | 3.84         | 114.40              | 6.63           | 1.88            | 49.18           |  |
| 290-300                      | -2                 | 251      | 0.364           |        | 19.51          | 5.18% | 3.64         | 118.04              | 9.53           | 3.95            | 51.04           |  |
| 300-310                      | -2                 | 263      | 0.412           |        | 39.64          | 5.18% | 4.12         | 122.16              | 11.66          | 16.11           | 53.88           |  |
| 310-320                      | -2                 | 257      | 0.388           |        | 1.99           | 5.18% | 3.88         | 126.04              | 7.27           | 6.47            | 135.18          |  |
| 320-330                      | -2.5               | 253      | 0.372           |        | 4.63           | 5.18% | 3.72         | 129.76              | 5.30           | 7.36            | 42.24           |  |
| 330-340                      | -2.5               | 272      | 0.448           |        | 88.99          | 5.18% | 4.48         | 134.24              | 36.16          | 35.64           | 73.20           |  |
| 340-350                      | -3                 | 244      | 0.336           |        | 1.58           | 5.18% | 3.36         | 137.60              | 8.66           | 14.69           | 41.49           |  |
| 350-360                      | -3                 | 235      | 0.3             |        | 9.48           | 5.18% | 3.00         | 140.60              | 7.56           | 2.58            | 15.92           |  |

| Surface Sample ID | BC conc (ng/g) | Error |
|-------------------|----------------|-------|
| ss east of pit #1 | 27.88          | 5.18% |
| ss east of pit #2 | no data        |       |

April 18, 2009: 13:00 PST

#NUM! outside of limits  
Soluble Ions - n/a

sunny, no clouds

Total depth (cm) 368  
Air Temp (C) 7  
tare (g) 158 1/4 liter 717 1 liter

| <i>0 is the soil surface</i> | Field Measurements |          |                 |                          | rBC            |       |          |                     |
|------------------------------|--------------------|----------|-----------------|--------------------------|----------------|-------|----------|---------------------|
| Depth Interval (cm)          | Temp (C)           | Mass (g) | Density (g/cm3) | Notes:                   | BC conc (ng/g) | Error | SWE (cm) | Cumulative SWE (cm) |
| 0-10                         | -0.5               | 1130     | 0.435           |                          | 3.17           | 13.1% | 4.35     | 4.35                |
| 10-20                        | -1                 | 1111     | 0.416           |                          | 2.73           | 13.1% | 4.16     | 8.51                |
| 20-30                        | -1                 | 1099     | 0.404           |                          | 4.62           | 13.1% | 4.04     | 12.55               |
| 30-40                        | -1                 | 1093     | 0.398           | ice layer @ 30-30.5      | 3.04           | 13.1% | 3.98     | 16.53               |
| 40-50                        | -0.5               | 574      | 0.544           |                          | 11.05          | 13.1% | 5.44     | 21.97               |
| 50-60                        | -0.5               | 1111     | 0.416           |                          | 1.49           | 13.1% | 4.16     | 26.13               |
| 60-70                        | -1                 | 1169     | 0.474           |                          | 2.95           | 13.1% | 4.74     | 30.87               |
| 70-80                        | -1                 | 1145     | 0.45            |                          | 2.45           | 13.1% | 4.50     | 35.37               |
| 80-90                        | -1                 | 1110     | 0.415           |                          | 1.63           | 13.1% | 4.15     | 39.52               |
| 90-100                       | -1                 | 1132     | 0.437           |                          | 0.60           | 13.1% | 4.37     | 43.89               |
| 100-110                      | -1                 | 1130     | 0.435           | ice layer @ 101-102      | 2.44           | 13.1% | 4.35     | 48.24               |
| 110-120                      | -1                 | 1139     | 0.444           |                          | 0.86           | 13.1% | 4.44     | 52.68               |
| 120-130                      | -1.5               | 1137     | 0.442           | ice layer @ 122-122.5    | 1.38           | 13.1% | 4.42     | 57.10               |
| 130-140                      | -1.5               | 1113     | 0.418           |                          | 2.04           | 13.1% | 4.18     | 61.28               |
| 140-150                      | -1.5               | 1170     | 0.475           |                          | 6.53           | 13.1% | 4.75     | 66.03               |
| 150-160                      | -1.5               | 1123     | 0.428           |                          | 5.22           | 13.1% | 4.28     | 70.31               |
| 160-170                      | -1.5               | 574      | 0.544           |                          | 9.01           | 13.1% | 5.44     | 75.75               |
| 170-180                      | -1.5               | 568      | 0.52            |                          | 7.51           | 13.1% | 5.20     | 80.95               |
| 180-190                      | -1.5               | 558      | 0.48            |                          | 8.41           | 13.1% | 4.80     | 85.75               |
| 190-200                      | -2                 | 563      | 0.5             |                          | 3.92           | 13.1% | 5.00     | 90.75               |
| 200-210                      | -1                 | 259      | 0.404           |                          | 3.40           | 6.5%  | 4.04     | 94.79               |
| 210-220                      | -1                 | 268      | 0.44            |                          | 0.66           | 6.5%  | 4.40     | 99.19               |
| 220-230                      | -0.5               | 283      | 0.5             |                          | 0.99           | 6.5%  | 5.00     | 104.19              |
| 230-240                      | -0.5               | 259      | 0.404           |                          | 1.13           | 6.5%  | 4.04     | 108.23              |
| 240-250                      | -1                 | 253      | 0.38            | ice layer @ 241-241.5    | 3.34           | 6.5%  | 3.80     | 112.03              |
| 250-260                      | -0.5               | 270      | 0.448           |                          | 2.81           | 6.5%  | 4.48     | 116.51              |
| 260-270                      | -0.5               | 259      | 0.404           |                          | 2.46           | 6.5%  | 4.04     | 120.55              |
| 270-280                      | -0.5               | 266      | 0.432           |                          | 2.36           | 6.5%  | 4.32     | 124.87              |
| 280-290                      | -1.5               | 250      | 0.368           |                          | 5.93           | 6.5%  | 3.68     | 128.55              |
| 290-300                      | -0.5               | 247      | 0.356           | small ice layer          | 13.68          | 6.5%  | 3.56     | 132.11              |
| 300-310                      | -1                 | 281      | 0.492           |                          | 12.01          | 6.5%  | 4.92     | 137.03              |
| 310-320                      | -1                 | 285      | 0.508           | ice layer @ 318-320      | 2.75           | 6.5%  | 5.08     | 142.11              |
| 320-330                      | -1                 | 268      | 0.44            |                          | 1.85           | 6.5%  | 4.40     | 146.51              |
| 330-340                      | -0.5               | 271      | 0.452           | ice layer @ 333-334, 339 | 17.14          | 6.5%  | 4.52     | 151.03              |
| 340-350                      | -0.5               | 261      | 0.412           | ice layer @ 347-349      | 8.40           | 6.5%  | 4.12     | 155.15              |
| 350-360                      | -0.5               | 278      | 0.48            |                          | 2.35           | 6.5%  | 4.80     | 159.95              |
| 358-368                      | -0.5               | 267      | 0.436           |                          | 6.10           | 6.5%  | 4.36     | 164.31              |

| Surface Sample ID | BC conc (ng/g) | Error |
|-------------------|----------------|-------|
| next bobcat #1    | 57.77          | 6.5%  |
| next bobcat #2    | 16.96          | 6.5%  |
| next bobcat #3    | 80.67          | 6.5%  |
| near ridge 1      | #NUM!          | 6.5%  |
| near ridge 2      | #NUM!          | 6.5%  |
| near ridge 3      | 29.10          | 6.5%  |
| near ridge 4      | 40.20          | 6.5%  |
| surf 1            | 50.04          | 6.5%  |
| surf 2            | 54.82          | 6.5%  |
| surf 3            | 70.71          | 6.5%  |

April 29, 2009: 12:00 PST

#NUM! outside of detection limits

clear sky, windy

Total depth (cm) 380  
 Air Temp (C) 3  
 tare (g) 431 1/4 liter 687 1 liter

| <i>0 is the soil surface</i> | Field Measurements |          |                 |                          | rBC            |       | Soluble Ions |                     |                |                 |                 |
|------------------------------|--------------------|----------|-----------------|--------------------------|----------------|-------|--------------|---------------------|----------------|-----------------|-----------------|
| Depth Interval (cm)          | Temp (C)           | Mass (g) | Density (g/cm3) | Notes:                   | BC conc (ng/g) | Error | SWE (cm)     | Cumulative SWE (cm) | Nitrate (um/L) | Ammonium (um/L) | Chloride (um/L) |
| 0-10                         | -0.5               | 1065     | 0.378           |                          | 1.94           | 6.45% | 3.78         | 3.78                | 7.90           | 2.06            | 29.14           |
| 10-20                        | 0                  | 1093     | 0.406           |                          | 1.80           | 6.45% | 4.06         | 7.84                | 8.60           | 2.65            | 16.43           |
| 20-30                        | -0.5               | 1090     | 0.403           |                          | 2.70           | 6.45% | 4.03         | 11.87               | 10.05          | 3.34            | 26.12           |
| 30-40                        | -0.5               | 1084     | 0.397           |                          | 4.97           | 6.45% | 3.97         | 15.84               | 6.68           | 1.46            | 60.54           |
| 40-50                        | -0.5               | 1163     | 0.476           |                          | 7.30           | 6.45% | 4.76         | 20.6                | 7.15           | 5.15            |                 |
| 50-60                        | -0.5               | 1123     | 0.436           |                          | 1.28           | 8.81% | 4.36         | 24.96               | 10.66          | 2.47            | 18.05           |
| 60-70                        | -0.5               | 1181     | 0.494           |                          | 2.77           | 6.45% | 4.94         | 29.9                | 10.69          | 0.54            | 76.26           |
| 70-80                        | -0.5               | 1160     | 0.473           |                          | 0.35           | 6.45% | 4.73         | 34.63               | 5.09           | 0.20            | 16.44           |
| 80-90                        | -0.5               | 1155     | 0.468           |                          | 1.17           | 6.45% | 4.68         | 39.31               | 9.41           | 1.54            | 21.47           |
| 90-100                       | -0.5               | 1147     | 0.460           |                          | 0.82           | 6.45% | 4.6          | 43.91               | 7.40           | 0.53            | 23.91           |
| 100-110                      | -0.5               | 1168     | 0.481           |                          | 0.68           | 6.45% | 4.81         | 48.72               | 7.86           | 0.83            | 17.96           |
| 110-120                      | -0.5               | 1120     | 0.433           |                          | 0.90           | 6.45% | 4.33         | 53.05               | 5.17           | 1.16            | 19.40           |
| 120-130                      | -0.5               | 1182     | 0.495           |                          | 1.71           | 6.45% | 4.95         | 58                  | 13.49          | 1.97            | 31.59           |
| 130-140                      | -0.5               | 1169     | 0.482           |                          | 0.60           | 6.45% | 4.82         | 62.82               | 36.83          | 0.46            |                 |
| 140-150                      | -0.5               | 1178     | 0.491           |                          | 1.21           | 6.45% | 4.91         | 67.73               | 7.94           | 1.02            | 17.30           |
| 150-160                      | -0.5               | 575      | 0.576           |                          | 1.89           | 8.81% | 5.76         | 73.49               | 6.55           | 5.34            | 77.38           |
| 160-170                      | -0.5               | 578      | 0.588           |                          | 5.84           | 8.81% | 5.88         | 79.37               | 11.01          | 8.50            | 126.82          |
| 170-180                      | -0.5               | 589      | 0.632           | ice layer @ 174-175      | 4.78           | 8.81% | 6.32         | 85.69               | 10.05          | 6.54            | 58.34           |
| 180-190                      | -0.5               | 584      | 0.612           |                          | 2.64           | 8.81% | 6.12         | 91.81               | 6.70           | 5.19            | 46.57           |
| 190-200                      | 0                  | 575      | 0.576           |                          | 1.59           | 8.81% | 5.76         | 97.57               | 6.36           | 4.66            | 70.56           |
| 200-210                      | 0                  | 576      | 0.580           |                          | 2.39           | 8.81% | 5.8          | 103.37              | 5.74           | 5.62            | 58.52           |
| 210-220                      | -0.5               | 582      | 0.604           |                          | 1.83           | 8.81% | 6.04         | 109.41              | 7.24           | 6.42            | 37.50           |
| 220-230                      | -0.5               | 577      | 0.584           |                          | 3.72           | 8.81% | 5.84         | 115.25              | 7.14           | 6.84            | 41.62           |
| 230-240                      | -0.5               | 569      | 0.552           |                          | 2.62           | 8.81% | 5.52         | 120.77              | 8.14           | 2.72            | 25.36           |
| 240-250                      | -0.5               | 580      | 0.596           |                          | 2.04           | 8.81% | 5.96         | 126.73              | 1.80           | 2.62            | 21.05           |
| 250-260                      | -0.5               | 584      | 0.612           |                          | 1.97           | 8.81% | 6.12         | 132.85              | 11.01          | 3.15            | 31.18           |
| 260-270                      | -0.5               | 579      | 0.592           |                          | 1.74           | 8.81% | 5.92         | 138.77              | 8.67           | 3.50            | 36.90           |
| 270-280                      | -0.5               | 583      | 0.608           |                          | 1.04           | 8.81% | 6.08         | 144.85              | 16.51          | 3.24            | 55.24           |
| 280-290                      | -0.5               | 568      | 0.548           | ice layer @ 287-288      | 2.30           | 8.81% | 5.48         | 150.33              | 5.87           | 3.18            | 22.79           |
| 290-300                      | -0.5               | 592      | 0.644           |                          | 2.44           | 8.81% | 6.44         | 156.77              | 8.74           | 4.42            | 29.54           |
| 300-310                      | -0.5               | 577      | 0.584           | ice layer @ 301-302      | 4.02           | 8.81% | 5.84         | 162.61              | 10.09          | 3.81            | 27.48           |
| 310-320                      | -1                 | 569      | 0.552           | ice layer @ 313-315, 320 | 5.74           | 8.81% | 5.52         | 168.13              | 10.40          | 15.64           | 78.53           |
| 320-330                      | -0.5               | 583      | 0.608           |                          | 18.71          | 8.81% | 6.08         | 174.21              | 10.80          | 9.36            | 34.78           |
| 330-340                      | -0.5               | 547      | 0.464           |                          | 5.15           | 8.81% | 4.64         | 178.85              | 7.30           | 15.15           | 62.19           |
| 340-350                      | -0.5               | 561      | 0.520           | ice layer @ 350          | 3.01           | 8.81% | 5.2          | 184.05              | 6.86           | 6.98            | 37.28           |
| 350-360                      | -0.5               | 552      | 0.484           |                          | 15.83          | 8.81% | 4.84         | 188.89              | 43.00          | 19.92           | 39.49           |
| 360-370                      | -0.5               | 550      | 0.476           |                          | 15.62          | 8.81% | 4.76         | 193.65              | 9.86           | 13.95           | 87.96           |
| 370-380                      | -0.5               | n/a      | 0.400           | slushy                   | 18.01          | 8.81% | 4            | 197.65              | 18.35          | 19.08           | 66.93           |

| Surface Sample ID | BC conc (ng/g) | Error |
|-------------------|----------------|-------|
| surf 1 near pit   | #NUM!          | 8.81% |
| surf 2            | #NUM!          | 8.81% |
| surf 3            | #NUM!          | 8.81% |
| ridge 1           | #NUM!          | 8.81% |
| ridge 2           | #NUM!          | 8.81% |
| ridge 3           | #NUM!          | 8.81% |
| near sm track 1   | #NUM!          | 8.81% |
| near sm track 2   | #NUM!          | 8.81% |

May 10, 2009: 13:00 PST

Soluble Ions - n/a

cirrus clouds, clear skies, breezy

Total depth (cm) 377  
 Air Temp (C) 9  
 tare (g) 435 1/4 liter 689 1 liter

| <i>0 is the soil surface</i> | Field Measurements |          |                              |                             | rBC            |       |          |                     |
|------------------------------|--------------------|----------|------------------------------|-----------------------------|----------------|-------|----------|---------------------|
| Depth Interval (cm)          | Temp (C)           | Mass (g) | Density (g/cm <sup>3</sup> ) | Notes:                      | BC conc (ng/g) | Error | SWE (cm) | Cumulative SWE (cm) |
| 0-10                         | -0.5               | 1188     | 0.499                        |                             | 4.60           | 6.50% | 4.99     | 4.99                |
| 10-20                        | -0.5               | 1141     | 0.452                        |                             | 1.82           | 6.50% | 4.52     | 9.51                |
| 20-30                        | -0.5               | 1113     | 0.424                        |                             | 5.04           | 6.50% | 4.24     | 13.75               |
| 30-40                        | -0.5               | 568      | 0.532                        | ice layer @37-38            | 6.11           | 6.50% | 5.32     | 19.07               |
| 40-50                        | -0.5               | 1202     | 0.513                        |                             | 4.54           | 6.50% | 5.13     | 24.20               |
| 50-60                        | -0.5               | 1160     | 0.471                        |                             | 1.88           | 6.50% | 4.71     | 28.91               |
| 60-70                        | -0.5               | 590      | 0.62                         |                             | 1.95           | 6.50% | 6.20     | 35.11               |
| 70-80                        | -0.5               | 597      | 0.648                        |                             | 4.81           | 6.50% | 6.48     | 41.59               |
| 80-90                        | -0.5               | 600      | 0.66                         | dark particles 80-82        | 3.58           | 6.50% | 6.60     | 48.19               |
| 90-100                       | -0.5               | 597      | 0.648                        |                             | 0.64           | 6.50% | 6.48     | 54.67               |
| 100-110                      | -0.5               | 583      | 0.592                        |                             | 1.42           | 6.50% | 5.92     | 60.59               |
| 110-120                      | -0.5               | 579      | 0.576                        |                             | 0.80           | 6.50% | 5.76     | 66.35               |
| 120-130                      | -0.5               | 600      | 0.66                         |                             | 1.59           | 6.50% | 6.60     | 72.95               |
| 130-140                      | -0.5               | 594      | 0.636                        |                             | 2.30           | 6.50% | 6.36     | 79.31               |
| 140-150                      | -0.5               | 598      | 0.652                        | "baby" ice layers - 143-144 | 5.06           | 6.50% | 6.52     | 85.83               |
| 150-160                      | -0.5               | 592      | 0.628                        |                             | 0.86           | 6.50% | 6.28     | 92.11               |
| 160-170                      | -0.5               | 594      | 0.636                        | ice layer 163-164           | 1.12           | 6.50% | 6.36     | 98.47               |
| 170-180                      | -0.5               | 607      | 0.688                        |                             | 1.71           | 6.50% | 6.88     | 105.35              |
| 180-190                      | -0.5               | 603      | 0.672                        |                             | 4.01           | 6.50% | 6.72     | 112.07              |
| 190-200                      | -0.5               | 595      | 0.64                         | ice layer 190-192           | 2.85           | 6.50% | 6.40     | 118.47              |
| 200-210                      | -0.5               | 583      | 0.592                        |                             | 6.90           | 6.50% | 5.92     | 124.39              |
| 210-220                      | -0.5               | 1191     | 0.502                        |                             | 5.92           | 6.50% | 5.02     | 129.41              |
| 220-230                      | -1                 | 1183     | 0.494                        |                             | 8.91           | 6.50% | 4.94     | 134.35              |
| 230-240                      | -1                 | 588      | 0.612                        | ice layer 233-234           | 5.48           | 6.50% | 6.12     | 140.47              |
| 240-250                      | -0.5               | 1212     | 0.523                        |                             | 5.48           | 6.50% | 5.23     | 145.70              |
| 250-260                      | -0.5               | 1213     | 0.524                        | ice layer 256-257           | 2.75           | 6.50% | 5.24     | 150.94              |
| 260-270                      | -0.5               | 1121     | 0.432                        | ice layer 267.5-268.5       | 4.08           | 6.50% | 4.32     | 155.26              |
| 270-280                      | -0.5               | 1159     | 0.47                         |                             | 2.44           | 6.50% | 4.70     | 159.96              |
| 280-290                      | -0.5               | 1176     | 0.487                        | ice layer 285-286           | 2.39           | 6.50% | 4.87     | 164.83              |
| 290-300                      | 0                  | 1213     | 0.524                        |                             | 1.41           | 6.50% | 5.24     | 170.07              |
| 300-310                      | 0                  | 1183     | 0.494                        | ice layer 305-308           | 5.16           | 6.50% | 4.94     | 175.01              |
| 310-320                      | -0.5               | 1276     | 0.587                        |                             | 3.76           | 6.50% | 5.87     | 180.88              |
| 320-330                      | -0.5               | 1253     | 0.564                        |                             | 7.31           | 6.50% | 5.64     | 186.52              |
| 330-340                      | -0.5               | 1257     | 0.568                        |                             | 8.12           | 6.50% | 5.68     | 192.20              |
| 340-350                      | -0.5               | 1219     | 0.53                         | ice layer 342-343           | 12.86          | 6.50% | 5.30     | 197.50              |
| 350-360                      | -0.5               | 1251     | 0.562                        | ice layer 351-352           | 9.52           | 6.50% | 5.62     | 203.12              |
| 360-370                      | -0.5               | 1196     | 0.507                        | ice layer 360-361           | 17.02          | 6.50% | 5.07     | 208.19              |
| 367-377                      | -0.5               | 1124     | 0.435                        |                             | 37.13          | 6.50% | 4.35     | 212.54              |

| Surface Sample ID | BC conc (ng/g) | Error |
|-------------------|----------------|-------|
| surf 1            | 20.49          | 6.50% |
| surf 2            | 56.63          | 6.50% |
| surf 3            | 37.49          | 6.50% |
| near track 1      | 132.88         | 6.50% |
| near track 2      | 120.36         | 6.50% |
| near track 3      | 171.70         | 6.50% |
| ridge 1           | 151.03         | 6.50% |
| ridge 2           | 123.68         | 6.50% |
| ridge 3           | 101.54         | 6.50% |

May 17, 2009: 11:45 - 13:00 PST

clear sky, warm

Total depth (cm) 312  
 Air Temp (C) 6  
 tare (g) 431 1/4 liter 689 1 liter

| <i>0 is the soil surface</i> | Field Measurements |          |                 |                   | rBC            |       | Soluble Ions - some values unavailable |                     |                |                 |                 |
|------------------------------|--------------------|----------|-----------------|-------------------|----------------|-------|----------------------------------------|---------------------|----------------|-----------------|-----------------|
| Depth Interval (cm)          | Temp (C)           | Mass (g) | Density (g/cm3) | Notes:            | BC conc (ng/g) | Error | SWE (cm)                               | Cumulative SWE (cm) | Nitrate (um/L) | Ammonium (um/L) | Chloride (um/L) |
| 0-10                         | -0.5               | 1269     | 0.58            | ice layer 4-5     | 3.01           | 5.18% | 5.8                                    | 5.80                | 7.01           | 6.42            | 75.61           |
| 10-20                        | -0.5               | 1165     | 0.476           |                   | 1.95           | 5.18% | 4.76                                   | 10.56               | 8.84           | 5.66            | 30.71           |
| 20-30                        | -0.5               | 1199     | 0.51            |                   | 3.93           | 6.50% | 5.1                                    | 15.66               | 11.50          | 3.10            | 29.31           |
| 30-40                        | -0.5               | 1183     | 0.494           | ice layer 37-38   | 11.73          | 6.50% | 4.94                                   | 20.60               | 10.75          | 1.91            |                 |
| 40-50                        | -0.5               | 1281     | 0.592           | dirty snow 36-43  | 11.25          | 6.50% | 5.92                                   | 26.52               | 8.95           | 5.76            | 102.21          |
| 50-60                        | -0.5               | 1218     | 0.529           |                   | 1.53           | 5.18% | 5.29                                   | 31.81               | 2.79           | 2.02            | 49.29           |
| 60-70                        | -0.5               | 1241     | 0.552           |                   | 4.64           | 5.18% | 5.52                                   | 37.33               | 9.92           | 2.44            | 109.72          |
| 70-80                        | -0.5               | 1238     | 0.549           | dirty snow 73-76  | 1.71           | 6.50% | 5.49                                   | 42.82               | 1.79           | 0.82            | 51.40           |
| 80-90                        | -0.5               | 1242     | 0.553           |                   | 1.18           | 6.50% | 5.53                                   | 48.35               | 6.67           | 7.40            | 36.47           |
| 90-100                       | -0.5               | 1165     | 0.476           |                   | 1.95           | 5.18% | 4.76                                   | 53.11               | 8.67           | 1.70            | 27.14           |
| 100-110                      | -0.5               | 1198     | 0.509           |                   | 0.48           | 6.50% | 5.09                                   | 58.20               | 5.07           | 0.20            | 23.34           |
| 110-120                      | -0.5               | 1229     | 0.54            | ice layer 118-119 | 1.50           | 5.18% | 5.4                                    | 63.60               | 11.79          | 1.85            | 30.04           |
| 120-130                      | -0.5               | 1250     | 0.561           |                   | 3.33           | 6.50% | 5.61                                   | 69.21               | 6.69           | 0.02            | 64.37           |
| 130-140                      | -0.5               | 1259     | 0.57            | ice layer 135-136 | 4.29           | 6.50% | 5.7                                    | 74.91               | 7.52           | 2.33            | 61.40           |
| 140-150                      | -0.5               | 1197     | 0.508           |                   | 1.48           | 6.50% | 5.08                                   | 79.99               | 5.18           | 4.54            |                 |
| 150-160                      | -0.5               | 1229     | 0.54            |                   | 1.17           | 5.18% | 5.4                                    | 85.39               | 5.41           | 1.91            | 22.58           |
| 160-170                      | -0.5               | 1228     | 0.539           |                   | 4.59           | 6.50% | 5.39                                   | 90.78               | 8.93           | 3.46            |                 |
| 170-180                      | -0.5               | 1252     | 0.563           |                   | 9.58           | 6.50% | 5.63                                   | 96.41               |                |                 |                 |
| 180-190                      | -0.5               | 1201     | 0.512           | ice layer 181-182 | 5.63           | 6.50% | 5.12                                   | 101.53              | 7.03           | 5.05            |                 |
| 190-200                      | -0.5               | 1234     | 0.545           |                   | 4.99           | 5.18% | 5.45                                   | 106.98              | 8.15           | 2.49            | 22.34           |
| 200-210                      | -0.5               | 1229     | 0.54            |                   | 11.70          | 6.50% | 5.4                                    | 112.38              | 11.50          | 2.65            | 19.44           |
| 210-220                      | -0.5               | 1249     | 0.56            |                   | 6.89           | 5.18% | 5.6                                    | 117.98              | 7.17           | 3.18            | 8.68            |
| 220-230                      | -0.5               | 1225     | 0.536           |                   | 9.15           | 6.50% | 5.36                                   | 123.34              | 0.33           | 5.04            | 18.97           |
| 230-240                      | -0.5               | 1226     | 0.537           | ice layer 236-237 | 4.05           | 7.25% | 5.37                                   | 128.71              | 5.87           | 4.66            | 32.93           |
| 240-250                      | -0.5               | 1193     | 0.504           |                   | 4.04           | 6.50% | 5.04                                   | 133.75              | 6.28           | 1.74            | 13.26           |
| 250-260                      | -0.5               | 1192     | 0.503           |                   | 5.37           | 5.18% | 5.03                                   | 138.78              |                |                 |                 |
| 260-270                      | -0.5               | 1165     | 0.476           |                   | 1.88           | 5.18% | 4.76                                   | 143.54              | 4.73           | 1.22            | 41.73           |
| 270-280                      | -0.5               | 1155     | 0.466           |                   | 2.85           | 5.18% | 4.66                                   | 148.20              | 12.25          | 1.20            | 33.27           |
| 280-290                      | -0.5               | 1224     | 0.535           | ice layer 284-285 | 7.22           | 6.50% | 5.35                                   | 153.55              | 2.54           | 1.00            | 24.01           |
| 290-300                      | -0.5               | 1194     | 0.505           |                   | 24.25          | 5.18% | 5.05                                   | 158.60              | 9.23           | 1.58            | 36.68           |
| 300-310                      | -0.5               | 1111     | 0.422           |                   | 75.16          | 6.50% | 4.22                                   | 162.82              | 9.63           | 6.44            |                 |

| Surface Sample ID | BC conc (ng/g) | Error |
|-------------------|----------------|-------|
| ridge 1           | 185.66         | 5.18% |
| ridge 2           | 300.00         | 5.18% |
| ridge 3           | 209.75         | 6.50% |
| surf 1            | 94.17          | 6.50% |
| surf 2            | 161.20         | 6.50% |
| surf 3            | 183.93         | 6.50% |
| tracks 1          | 220.03         | 7.25% |
| tracks 2          | 429.35         | 6.50% |
| tracks 3          | 255.58         | 7.25% |
| 36-43 IL          | 11.62          | 5.18% |
| Top Gondola       | 24.46          | 6.50% |
| 183-184 IL        | 4.75           | 7.25% |

May 23, 2009: 13:00 PST

some cumulonimbus clouds, lite breeze, sunny

Total depth (cm) 268  
 Air Temp (C) 12.5  
 tare (g) 434 1/4 liter 687 1 liter

| <i>0 is the soil surface</i> | Field Measurements |          |                              |                   | rBC            |       | Soluble Ions |                     |                |                 |                 |
|------------------------------|--------------------|----------|------------------------------|-------------------|----------------|-------|--------------|---------------------|----------------|-----------------|-----------------|
| Depth Interval (cm)          | Temp (C)           | Mass (g) | Density (g/cm <sup>3</sup> ) | Notes:            | BC conc (ng/g) | Error | SWE (cm)     | Cumulative SWE (cm) | Nitrate (um/L) | Ammonium (um/L) | Chloride (um/L) |
| 0-10                         | -0.5               | 1222     | 0.535                        |                   | 4.69           | 7.25% | 5.35         | 5.35                | 15.37          | 2.66            | 36.71           |
| 10-20                        | -0.5               | 1213     | 0.526                        |                   | 2.06           | 7.25% | 5.26         | 10.61               | 6.43           | 2.98            | 15.24           |
| 20-30                        | -0.5               | 1169     | 0.482                        |                   | 3.57           | 7.25% | 4.82         | 15.43               | 9.37           | 3.69            | 21.00           |
| 30-40                        | -0.5               | 1195     | 0.508                        | ice layer 37-38   | 9.30           | 6.50% | 5.08         | 20.51               | 15.10          | 3.83            | 52.54           |
| 40-50                        | -0.5               | 1254     | 0.567                        | dirty snow 42-44  | 10.21          | 7.25% | 5.67         | 26.18               | 11.96          | 4.04            | 13.89           |
| 50-60                        | -0.5               | 1245     | 0.558                        |                   | 3.51           | 6.50% | 5.58         | 31.76               | 4.33           | 2.01            | 32.94           |
| 60-70                        | -0.5               | 1268     | 0.581                        |                   | 1.81           | 7.25% | 5.81         | 37.57               | 10.35          | 3.08            |                 |
| 70-80                        | -0.5               | 1262     | 0.575                        |                   | 2.70           | 7.25% | 5.75         | 43.32               | 9.47           | 0.39            |                 |
| 80-90                        | -0.5               | 1210     | 0.523                        | dirty snow 70-73  | 1.75           | 7.25% | 5.23         | 48.55               | 8.55           | 2.00            | 19.71           |
| 90-100                       | -0.5               | 1273     | 0.586                        |                   | 1.69           | 7.25% | 5.86         | 54.41               | 7.85           | 2.89            |                 |
| 100-110                      | -0.5               | 1258     | 0.571                        |                   | 0.72           | 6.50% | 5.71         | 60.12               | 8.77           | 1.49            |                 |
| 110-120                      | -0.5               | 1271     | 0.584                        |                   | 2.86           | 6.50% | 5.84         | 65.96               | 14.02          | 2.14            | 23.85           |
| 120-130                      | -0.5               | 1228     | 0.541                        |                   | 3.10           | 6.50% | 5.41         | 71.37               | 12.08          | 1.29            | 37.65           |
| 130-140                      | -0.5               | 1271     | 0.584                        | ice layer 132-133 | 4.05           | 6.50% | 5.84         | 77.21               | 12.02          | 0.83            | 36.57           |
| 140-150                      | -0.5               | 1192     | 0.505                        |                   | 1.11           | 6.50% | 5.05         | 82.26               | 9.34           | 1.33            | 11.53           |
| 150-160                      | -0.5               | 1277     | 0.59                         | ice layer 150-151 | 2.06           | 7.25% | 5.90         | 88.16               | 5.35           | 2.34            | 20.42           |
| 160-170                      | -0.5               | 1232     | 0.545                        |                   | 3.19           | 6.50% | 5.45         | 93.61               | 10.37          | 3.86            | 13.15           |
| 170-180                      | -0.5               | 1167     | 0.48                         | ice layer 174-177 | 7.20           | 6.50% | 4.80         | 98.41               | 11.91          | 7.02            | 21.35           |
| 180-190                      | -0.5               | 1261     | 0.574                        | ice layer 183-184 | 10.12          | 6.50% | 5.74         | 104.15              | 9.75           | 2.13            | 16.37           |
| 190-200                      | -0.5               | 1227     | 0.54                         |                   | 12.00          | 6.50% | 5.40         | 109.55              | 10.20          | 3.48            | 18.06           |
| 200-210                      | -0.5               | 1195     | 0.508                        |                   | 12.11          | 7.25% | 5.08         | 114.63              | 9.87           | 4.27            | 19.17           |
| 210-220                      | -0.5               | 1203     | 0.516                        |                   | 11.12          | 6.50% | 5.16         | 119.79              | 17.38          | 3.25            | 18.06           |
| 220-230                      | -0.5               | 1195     | 0.508                        |                   | 8.70           | 6.50% | 5.08         | 124.87              | 12.71          | 3.13            | 26.28           |
| 230-240                      | -0.5               | 1151     | 0.464                        |                   | 9.73           | 6.50% | 4.64         | 129.51              | 11.57          | 2.35            | 10.85           |
| 240-250                      | -0.5               | 1222     | 0.535                        |                   | 19.58          | 6.50% | 5.35         | 134.86              | 8.60           | 1.25            | 32.54           |
| 250-260                      | 0                  | 1169     | 0.482                        |                   | 18.24          | 6.50% | 4.82         | 139.68              | 11.37          | 0.81            | 26.41           |
| 258-268                      | 0                  | 1137     | 0.45                         |                   | 58.04          | 6.50% | 4.50         | 144.18              | 10.72          | 0.73            | 61.61           |

| Surface Sample ID | BC conc (ng/g) | Error |
|-------------------|----------------|-------|
| ridge 1           | 81.24          | 6.50% |
| ridge 2           | 147.72         | 7.25% |
| ridge 3           | 202.63         | 7.25% |
| surf 1            | 84.18          | 7.25% |
| surf 2            | 305.21         | 7.25% |
| surf 3            | 128.05         | 7.25% |
| 174-178 Ice Layer | 10.10          | 6.50% |

May 30, 2009: 12:00 PST

#NUM! outside of detection limits  
ridge dried out, so no ridge samples

overcast, some sun

Total depth (cm) 210  
Air Temp (C) 6  
tare (g) 441 1/4 liter

| <i>0 is the soil surface</i> | Field Measurements |          |                 |                  | rBC            |        | Soluble Ions |                     |                |                 |                 |
|------------------------------|--------------------|----------|-----------------|------------------|----------------|--------|--------------|---------------------|----------------|-----------------|-----------------|
| Depth Interval (cm)          | Temp (C)           | Mass (g) | Density (g/cm3) | Notes:           | BC conc (ng/g) | Error  | SWE (cm)     | Cumulative SWE (cm) | Nitrate (um/L) | Ammonium (um/L) | Chloride (um/L) |
| 0-10                         | -0.5               | 588      | 0.588           |                  | 1.20           | 13.08% | 5.88         | 5.88                | 2.99           | 3.39            | 27.07           |
| 10-20                        | -0.5               | 571      | 0.52            |                  | 1.64           | 13.08% | 5.20         | 11.08               | 5.49           | 1.19            | 0.00            |
| 20-30                        | -0.5               | 582      | 0.564           |                  | 1.68           | 13.08% | 5.64         | 16.72               | 8.16           | 3.41            | 21.78           |
| 30-40                        | -0.5               | 572      | 0.524           |                  | 2.80           | 13.08% | 5.24         | 21.96               | 8.22           | 1.86            | 31.26           |
| 40-50                        | -0.5               | 590      | 0.596           | 41-42 cm IL      | 6.67           | 13.08% | 5.96         | 27.92               | 8.23           | 3.77            | 0.00            |
| 50-60                        | -0.5               | 599      | 0.632           |                  | 3.96           | 13.08% | 6.32         | 34.24               | 4.69           | 0.01            | 20.99           |
| 60-70                        | -0.5               | 601      | 0.64            |                  | 0.84           | 13.08% | 6.40         | 40.64               | 6.16           | 2.26            | 60.72           |
| 70-80                        | -0.5               | 610      | 0.676           | 77-86 DIRTY SNOW | 1.97           | 13.08% | 6.76         | 47.40               | 2.68           | 0.05            | 28.47           |
| 80-90                        | -0.5               | 605      | 0.656           |                  | 2.87           | 13.08% | 6.56         | 53.96               | 0.23           | 0.02            | 34.24           |
| 90-100                       | -0.5               | 600      | 0.636           |                  | 0.51           | 13.08% | 6.36         | 60.32               | 1.94           | 0.02            | 42.68           |
| 100-110                      | -0.5               | 607      | 0.664           |                  | 0.64           | 13.08% | 6.64         | 66.96               | 3.55           | 1.30            | 21.64           |
| 110-120                      | -0.5               | 603      | 0.648           |                  | 0.83           | 13.08% | 6.48         | 73.44               | 3.14           | 0.08            |                 |
| 120-130                      | -0.5               | 606      | 0.66            |                  | 0.40           | 13.08% | 6.60         | 80.04               | 1.25           | 1.54            | 0.00            |
| 130-140                      | -0.5               | 597      | 0.624           |                  | 1.41           | 13.08% | 6.24         | 86.28               | 4.10           | 1.36            | 24.31           |
| 140-150                      | -0.5               | 609      | 0.672           |                  | 1.29           | 13.08% | 6.72         | 93.00               | 4.51           | 1.25            | 27.82           |
| 150-160                      | -0.5               | 611      | 0.68            |                  | 3.21           | 13.08% | 6.80         | 99.80               | 5.15           | 0.20            | 0.00            |
| 160-170                      | -0.5               | 605      | 0.656           |                  | 0.81           | 13.08% | 6.56         | 106.36              | 5.36           | 0.07            | 40.47           |
| 170-180                      | -0.5               | 642      | 0.804           | 173-175 cm IL    | 0.74           | 13.08% | 8.04         | 114.40              | 2.45           | 1.22            | 13.45           |
| 180-190                      | -0.5               | 596      | 0.62            |                  | 0.98           | 13.08% | 6.20         | 120.60              | 2.93           | 3.62            | 23.79           |
| 190-200                      | -0.5               | 583      | 0.568           |                  | 4.70           | 13.08% | 5.68         | 126.28              | 7.35           | 4.95            | 71.33           |
| 200-210                      | -0.5               | 585      | 0.576           | 205-206 cm IL    | 5.75           | 13.08% | 5.76         | 132.04              | 4.82           | 6.19            | 0.00            |

| Surface Sample ID | BC conc (ng/g) | Error  |
|-------------------|----------------|--------|
| surf 1            | #NUM!          | 13.08% |
| surf 2            | #NUM!          | 13.08% |
| surf 3            | #NUM!          | 13.08% |



Lysimeter collection between 10-May and 17-May samplings

|       | mL/week | tips/week | depth loss cm/week (1 tip = .01 cm) | flow rate (cm <sup>3</sup> /week) | flow rate (m <sup>3</sup> /day) |
|-------|---------|-----------|-------------------------------------|-----------------------------------|---------------------------------|
| Lys 1 | 9856    | 99        | 0.99                                | 9856                              | 1.41E-03                        |
| Lys 2 | 464     | 5         | 0.05                                | 464                               | 6.63E-05                        |
| Lys 3 | 23200   | 232       | 2.32                                | 23200                             | 3.31E-03                        |
| Lys 4 | 13512   | 135       | 1.35                                | 13512                             | 1.93E-03                        |

| Mean flux (m <sup>3</sup> /day) | ranges   |
|---------------------------------|----------|
| 1.68E-03                        | 3.31E-03 |
|                                 | 6.63E-05 |

Lysimeter collection between 17-May and 23-May samplings

|       | mL/week | tips/week | depth loss cm/week (1 tip = .01 cm) | flow rate (cm <sup>3</sup> /week) | flow rate (m <sup>3</sup> /day) |
|-------|---------|-----------|-------------------------------------|-----------------------------------|---------------------------------|
| Lys 1 | 15352   | 154       | 1.54                                | 15352                             | 2.19E-03                        |
| Lys 2 | 336     | 3         | 0.03                                | 336                               | 4.80E-05                        |
| Lys 3 | 29200   | 292       | 2.92                                | 29200                             | 4.17E-03                        |
| Lys 4 | 17064   | 171       | 1.71                                | 17064                             | 2.44E-03                        |

| Mean flux (m <sup>3</sup> /day) | ranges   |
|---------------------------------|----------|
| 2.21E-03                        | 4.17E-03 |
|                                 | 4.80E-05 |

Lysimeter collection between 23-May to 30-May samplings

|       | mL/week | tips/week | depth loss cm/week (1 tip = .01 cm) | flow rate (cm <sup>3</sup> /week) | flow rate (m <sup>3</sup> /day) | flushed rBC mass ng/week | Mean flux (m <sup>3</sup> /day) | ranges   |
|-------|---------|-----------|-------------------------------------|-----------------------------------|---------------------------------|--------------------------|---------------------------------|----------|
| Lys 1 | 28536   | 285       | 2.85                                | 28536                             | 4.08E-03                        | 1271                     | 4.73E-03                        | 9.08E-03 |
| Lys 2 | 19744   | 197       | 1.97                                | 19744                             | 2.82E-03                        | 879                      |                                 | 2.82E-03 |
| Lys 3 | 63528   | 635       | 6.35                                | 63528                             | 9.08E-03                        | 2829                     |                                 |          |
| Lys 4 | 20496   | 205       | 2.05                                | 20496                             | 2.93E-03                        | 913                      |                                 |          |

| date        | ng rBC mass | % of 23-May |
|-------------|-------------|-------------|
| 22-May      | 989         |             |
| 30-May      | 255         |             |
| loss ng rBC | 733         | 74.2%       |

in one week's time, almost 75% of rBC ng was lost

Equations and Rationale

Flow rate (cm<sup>3</sup>/week)\* rBC (ppb or ng/g or ng/cm<sup>3</sup>) = ng rBC mass flushed/week

The flow rate for each lysimeter was multiplied by the average rBC collected for one tip on 23-May, and assumed to be a representative concentration for the entire week. The four southern lysimeters confirmed loss of rBC mass (ng), all value being greater than the loss of rBC found in the snow pit (733.384 ng)

Data to use for Radiative Forcing Calculations - TOP 30 cm (30 cm = snowpack thickness)

|        | BC (ng) | total dust (ng) | snow mass (g)* | SWE (cm) in top 30 cm snow (computed from density) |
|--------|---------|-----------------|----------------|----------------------------------------------------|
| 28-Feb | 125.0   | 2.83E+06        | 906            | 9.52                                               |
| 28-Mar | 508.0   | 1.73E+07        | 443.2          | 10.84                                              |
| 29-Apr | 325.4   | 7.94E+07        | 376            | 13.60                                              |
| 10-May | 403.5   | 3.11E+07        | 1569           | 15.04                                              |
| 17-May | 654.0   | 5.69E+07        | 1512           | 14.62                                              |
| 23-May | 570.5   | 6.60E+07        | 1518           | 14.67                                              |
| 30-May | 8.5     | 1.05E+06        | 456            | 19.92                                              |

|                  | geomean BC | geomean dust |
|------------------|------------|--------------|
| ration in top 30 |            |              |
| accumulation     | 274.41     | 1.57E+07     |
| melt             | 189.14     | 1.87E+07     |

\*28-Mar and 29-Apr samples taken using the 1/4 L cutter, whereas other samples were extracted using 1-L cutter, hence the total snow mass is less in these 2 cases

Geometric mean (range) Dust in Top 30 cm

ENTIRE SAMPLING PERIOD (N=8)

|         | BC (ng) | total dust (ng) |
|---------|---------|-----------------|
| geomean | 222     | 2.E+07          |
| max     | 654     | 8.E+07          |
| min     | 9       | 1.E+06          |

ACCUMULATION (FEB, MAR & APR, N=3)

|         | BC (ng) | total dust (ng) |
|---------|---------|-----------------|
| geomean | 274     | 2.E+07          |
| max     | 508     | 8.E+07          |
| min     | 125     | 3.E+06          |

MELT (MAY, N=4)

|         | BC (ng) | total dust (ng) |
|---------|---------|-----------------|
| geomean | 189     | 2.E+07          |
| max     | 654     | 7.E+07          |
| min     | 9       | 1.E+06          |
